# Supplementary material for: A training program for fibromyalgia management: A 5-year pilot study
Source: PubMed Central journal article supplement — SAGE Open Med. 2020 Oct 7;8:2050312120943072. doi: 10.1177/2050312120943072 (PMC7564648; doi:10.1177/2050312120943072), 2020-10-07
Supplement: additional_Table_.pdf [file additional_Table_.pdf]

| Variable                   | Group | n  | T0<br>Mean (SD) | T1<br>Mean (SD)        | T2<br>Mean (SD)       | T3<br>Mean (SD)       | T4<br>Mean (SD)        | T5<br>Mean (SD)       | p<br>(T0-T1)         | p<br>(T0-T5)         | Anova group<br>F(2,86)      |
|----------------------------|-------|----|-----------------|------------------------|-----------------------|-----------------------|------------------------|-----------------------|----------------------|----------------------|-----------------------------|
| Pain intensity (VAS 0-100) | AC    | 28 | 60.57 (12.91)   | <b>44.38 (10.72)*#</b> | <b>38.54 (8.36)*#</b> | <b>27.75 (5.98)*#</b> | <b>10.75 (2.63)*#</b>  | <b>12.04 (2.73)*#</b> | <b>p &lt; 0.0001</b> | <b>p &lt; 0.0001</b> | <b>=191.56</b><br>p < 0.001 |
|                            | SE    | 31 | 61.74 (11.07)   | <b>50.39 (8.44)*</b>   | <b>53.42 (9.04)*</b>  | 54.90 (8.70)          | <b>58.42 (14.90)*</b>  | <b>60.68 (13.75)*</b> | <b>p &lt; 0.0001</b> | NS(p = 1.00)         |                             |
|                            | PA    | 30 | 61.50 (9.64)    | <b>69.23 (9.19)#</b>   | <b>65.33 (6.81)#</b>  | 62.00 (8.92)          | <b>67.47 (7.72)#</b>   | <b>72.50 (7.45)#</b>  | <b>p &lt; 0.05</b>   | <b>p &lt; 0.0001</b> |                             |
| Painkiller grade (0-3)     | AC    | 28 | 2.36 (0.73)     | <b>1.15 (0.59)*#</b>   | <b>0.32 (0.47)*#</b>  | <b>0.25 (0.44)*#</b>  | <b>0.07 (0.26)*#</b>   | <b>0.14 (0.36)*#</b>  | <b>p &lt; 0.0001</b> | <b>p &lt; 0.0001</b> | <b>=59.74</b><br>p < 0.001  |
|                            | SE    | 31 | 2.42 (0.72)     | 1.87 (0.50)            | 1.13 (0.62)           | <b>1.03 (0.71)*</b>   | <b>1.03 (0.66)*</b>    | <b>0.97 (0.60)*</b>   | <b>p &lt; 0.01</b>   | <b>p &lt; 0.0001</b> |                             |
|                            | PA    | 30 | 2.27 (0.69)     | 1.93 (0.64)            | 1.37 (0.72)           | <b>1.73 (0.69)#</b>   | <b>1.77 (0.68)#</b>    | <b>1.83 (0.38)#</b>   | NS (p = 0.48)        | NS (p = 0.08)        |                             |
| FIQ (0-100)                | AC    | 28 | 65.50 (7.47)    | <b>34.96 (10.11)*#</b> | <b>27.79 (8.19)*#</b> | <b>25.35 (7.69)*#</b> | <b>15.50 (5.06)*#</b>  | <b>13.75 (4.53)*#</b> | <b>p &lt; 0.0001</b> | <b>p &lt; 0.0001</b> | <b>=297.95</b><br>p < 0.001 |
|                            | SE    | 31 | 66.74 (7.90)    | 57.55 (7.23)           | <b>54.22 (7.83)*</b>  | 53.93 (7.93)          | <b>48.74 (7.73)*</b>   | <b>45.74 (7.75)*</b>  | <b>p &lt; 0.0001</b> | <b>p &lt; 0.0001</b> |                             |
|                            | PA    | 30 | 65.53 (7.63)    | 59.37 (8.43)           | <b>62.97 (5.36)#</b>  | 60.57 (7.62)          | <b>63.47 (8.80)#</b>   | <b>65.47 (6.00)#</b>  | <b>p &lt; 0.01</b>   | NS (p = 1.00)        |                             |
| HAD-A (0-21)               | AC    | 28 | 11.07 (2.09)    | <b>7.36 (2.53)*</b>    | <b>6.39 (1.77)*</b>   | <b>5.07 (1.70)*#</b>  | <b>4.79 (1.57)*#</b>   | <b>4.07 (1.18)*#</b>  | <b>p &lt; 0.0001</b> | <b>p &lt; 0.0001</b> | <b>=75.01</b><br>p < 0.001  |
|                            | SE    | 31 | 11.97 (2.01)    | <b>7.87 (1.87)*</b>    | <b>7.87 (2.19)*</b>   | <b>7.74 (2.03)*</b>   | <b>8.06 (1.91)*</b>    | <b>8.10 (2.24)*</b>   | <b>p &lt; 0.0001</b> | <b>p &lt; 0.0001</b> |                             |
|                            | PA    | 30 | 11.33 (2.11)    | 10.13 (2.47)           | 10.63 (2.11)          | <b>11.13 (2.11)#</b>  | <b>12.13 (1.76)#</b>   | <b>12.53 (1.79)#</b>  | NS (p = 0.1)         | NS (p = 0.1)         |                             |
| HAD-D (0-21)               | AC    | 28 | 9.18 (3.14)     | <b>6.54 (3.83)*</b>    | <b>5.54 (3.04)*</b>   | <b>4.68 (2.80)*</b>   | <b>4.04 (2.56)*</b>    | <b>2.79 (2.77)*</b>   | <b>p &lt; 0.0001</b> | <b>p &lt; 0.0001</b> | <b>=16.73</b><br>p < .0001  |
|                            | SE    | 31 | 8.81 (2.95)     | <b>6.19 (2.97)*</b>    | <b>5.32 (2.48)*</b>   | <b>4.93 (2.31)*</b>   | <b>4.87 (2.58)*</b>    | <b>4.64 (2.55)*</b>   | <b>p &lt; 0.0001</b> | <b>p &lt; 0.0001</b> |                             |
|                            | PA    | 30 | 8.93 (2.83)     | 8.97 (2.20)            | 8.97 (2.91)           | 9.13 (2.80)           | 8.67 (3.01)            | 8.53 (3.01)           | NS (p = 1.00)        | NS (p = 1.00)        |                             |
| Sleep quality (VAS 0-100)  | AC    | 28 | 88.89 (10.49)   | 79.89 (12.05)          | <b>71.39 (9.42)*</b>  | <b>55.11 (9.20)*#</b> | <b>33.68 (10.45)*#</b> | <b>34.11 (8.58)*#</b> | <b>p &lt; 0.01</b>   | <b>p &lt; 0.0001</b> | <b>=125.24</b><br>p < 0.001 |
|                            | SE    | 31 | 86.23 (7.94)    | 75.84 (8.21)           | <b>72.58 (10.58)*</b> | <b>74.32 (10.61)*</b> | 77.71 (9.15)           | 79.29 (10.23)         | <b>p &lt; 0.0001</b> | <b>p &lt; 0.05</b>   |                             |
|                            | PA    | 30 | 85.30 (10.70)   | 79.87 (10.70)          | 83.20 (5.72)          | <b>84.30 (5.72)#</b>  | 84.63 (5.76)           | 85.47 (5.22)          | NS (p = 0.33)        | NS (p = 1.00)        |                             |
| HR (bpm)                   | AC    | 28 | 75.54 (6.64)    | 74.71 (5.89)           | 73.11 (6.96)          | 70.79 (5.93)          | <b>66.04 (4.81)*#</b>  | <b>63.39 (4.15)*#</b> | NS (p = 1.00)        | <b>p &lt; 0.0001</b> | <b>=3.27</b><br>p < 0.05    |
|                            | SE    | 31 | 75.10 (6.65)    | 73.97 (6.85)           | 72.87 (6.55)          | 74.32 (6.43)          | 73.87 (6.65)           | 74.32 (7.07)          | NS (p = 0.99)        | NS (p = 1.00)        |                             |
|                            | PA    | 30 | 74.97 (6.61)    | 73.90 (6.77)           | 72.60 (6.01)          | 73.80 (6.33)          | 73.77 (6.49)           | 74.40 (6.93)          | NS (p = 0.99)        | NS (p = 1.00)        |                             |

Additional table: Data for Active (AC), Semi-Active (SE) and Passive (PA) groups over the five years of the study

In bold: statistically significant values for intergroup comparison

\*Significant difference (p < 0.05) from PA group

#Significant difference (p < 0.05) from SE group

p(T0-T1): p-value for difference between baseline and 1 year of training for each group

p(T0-T5): p-value for difference between baseline and 5 years of training for each group

Anova group: ANOVA results for the effect of the group (F(2,86)) for each variable

SD: standard deviation

VAS: visual analog scale

FIQ: Fibromyalgia Impact Questionnaire

HAD: Hospital Anxiety Depression scale (A: anxiety; D: depression)

HR: heart rate

bpm: beats per minute
